# Supplementary material for: Angular-resolved Rabi oscillations of orthorhombic spins in a Co(ii) molecular qubit
Source: Royal Society of Chemistry journal article supplement (doi:10.1039/d4cp01017e), 2024-01-01
Supplement: d4cp01017e1.pdf [file d4cp01017e1.pdf]

## Supporting Information

### Angular-Resolved Rabi Oscillations of Orthorhombic Spins in a Co(II) Molecular Qubit

Yi-Qiu Liao,<sup>a</sup> You-Chao Liu,<sup>a</sup> Yi-Han Wang,<sup>b</sup> Peng-Xiang Fu,<sup>b</sup> Yi Xie,<sup>a</sup> Song Gao,<sup>a,b,c</sup>  
Ye-Xin Wang,<sup>\*d</sup> Zheng Liu<sup>\*c</sup> and Shang-Da Jiang<sup>\*a</sup>

*a. Spin-X Institute, School of Chemistry and Chemical Engineering, South China University of Technology, Guangzhou, 511442, China. E-mail: jiangsd@scut.edu.cn*

*b. Beijing National Laboratory of Molecular Science, Beijing Key Laboratory of Magnetoelectric Materials and Devices, College of Chemistry and Molecular Engineering, Peking University, Beijing (China).*

*c. Key Laboratory of Bioinorganic and Synthetic Chemistry of Ministry of Education, LIFM, School of Chemistry, IGCME, Sun Yat-Sen University, Guangzhou 510275, China. E-mail: liuzh363@mail.sysu.edu.cn*

*d. Quantum Science Centre of Guangdong-Hong Kong-Macao Greater Bay Area, Shenzhen, 518045, China. E-mail: wanyexin@quantumsc.cn*

## List of Supporting Information

### SI 1 Supplementary Figures (Fig), Tables and Equations (Eq)

Table S1. Crystallographic data

Fig.S1. The result of face indexing showing on a physical crystal

Fig.S2. Powder X-ray diffraction

Fig.S3. Relative position between crystal frame and tensor frames

Fig.S4.  $T_1$  and  $T_m$  curves at 5 K in the  $g_z$  direction

Fig.S5. Temperature dependence of  $T_1$  at 3907 G

Table S2.  $T_1$  and  $T_m$  data at 5 K in the  $g_z$  direction

Table S3.  $T_1$  data at different temperatures at 3907 G

Fig.S6. Rabi oscillations measured at 5 K when  $B_0 \parallel \mathbf{b}, B_1 \parallel \mathbf{a}$

Fig.S7. EDFS of the crystal with TEMPO internal standard

Eq.S1. Calculation formulas of internal standard method

Fig.S8. Rabi oscillation experiments when  $B_1 \parallel g_z, g_x, g_y$

Fig.S9. Anisotropic Rabi oscillation experiments with internal standard

Fig.S10. Calibration of experimental rotation angle  $\alpha$

Fig.S11.  $T_1$  and  $T_m$  curves at 5 K in the  $g_y$  direction

### SI 2 Theoretical analysis of anisotropic Rabi oscillation (I)

### SI 3 Theoretical analysis of anisotropic Rabi oscillation (II)

## SI 1 Supplementary Figures (Fig), Tables and Equations (Eq)

Table S1. Crystallographic data

| <b>Zn<sub>0.994</sub>Co<sub>0.006</sub></b> |                                                                  |
|---------------------------------------------|------------------------------------------------------------------|
| Molecular formula                           | C <sub>16</sub> H <sub>26</sub> N <sub>4</sub> O <sub>8</sub> Zn |
| Molecule weight                             | 467                                                              |
| Crystal system                              | Orthorhombic                                                     |
| Space group                                 | <i>Pccn</i>                                                      |
| <i>a</i> , Å                                | 15.2423                                                          |
| <i>b</i> , Å                                | 9.3278                                                           |
| <i>c</i> , Å                                | 13.0916                                                          |
| $\alpha$ , °                                | 90                                                               |
| $\beta$ , °                                 | 90                                                               |
| $\gamma$ , °                                | 90                                                               |
| <i>V</i> , Å <sup>3</sup>                   | 1864.33                                                          |
| <i>Z</i>                                    | 1                                                                |

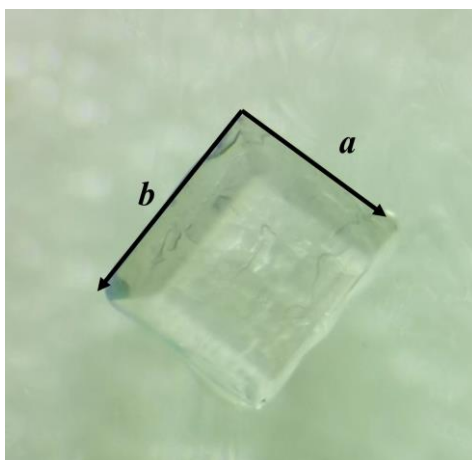

Fig.S1. (a) The result of face indexing showing on a physical crystal. The markings represent crystallographic *a*-axis and *b*-axis respectively.

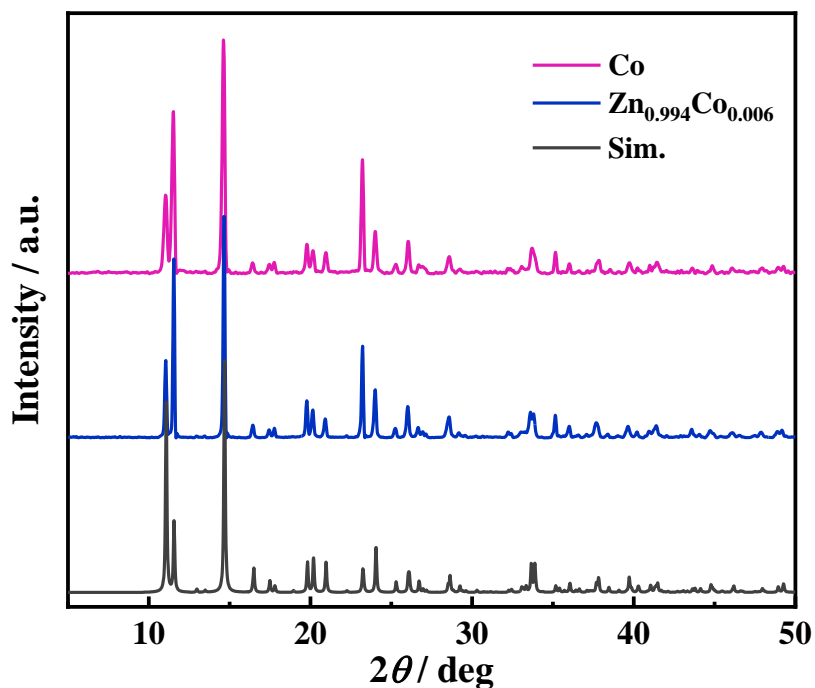

Fig.S2. Powder X-ray diffraction (PXRD) patterns of Co(H<sub>2</sub>dota) (**Co**) and Zn<sub>0.994</sub>Co<sub>0.006</sub>(H<sub>2</sub>dota) (**Zn<sub>0.994</sub>Co<sub>0.006</sub>**). The simulated pattern (**Sim.**) is also shown for comparison.

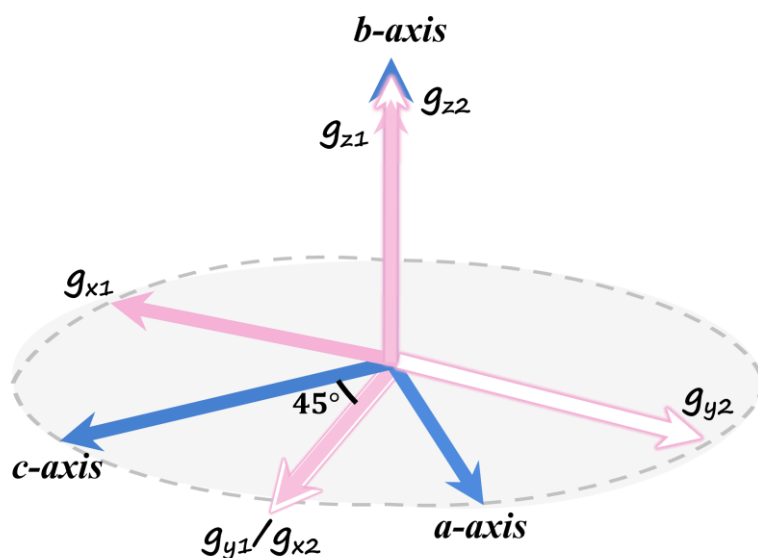

Fig.S3. Relative position between the crystal frame (*a*-axis, *b*-axis, *c*-axis) and tensor frames of two magnetically inequivalent Co(II) sites. The Euler transformations from the crystal frame to tensor frame of Co-1 and Co-2 are  $\bar{R}_1(-90^\circ - 90^\circ - 45^\circ)$ ,  $\bar{R}_2(-90^\circ - 90^\circ 45^\circ)$  respectively.

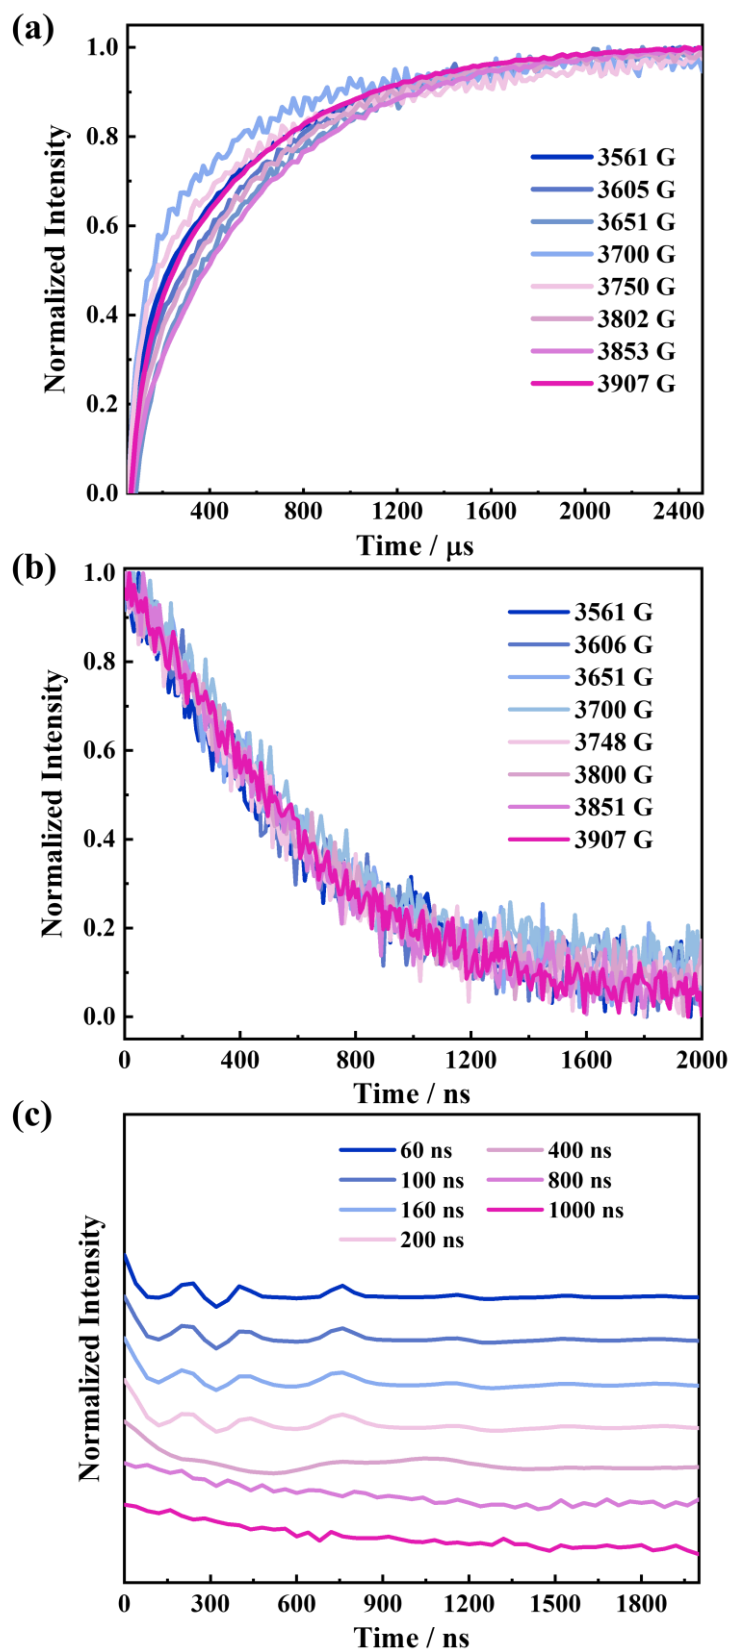

Fig.S4.  $T_1$  (a) and  $T_m$  (b) curves at 5 K when  $B_0 \parallel \mathbf{b}$ . (c)  $T_m$  curves measured by different pulse lengths at 5 K by AWG and variation of ESEEM observed.

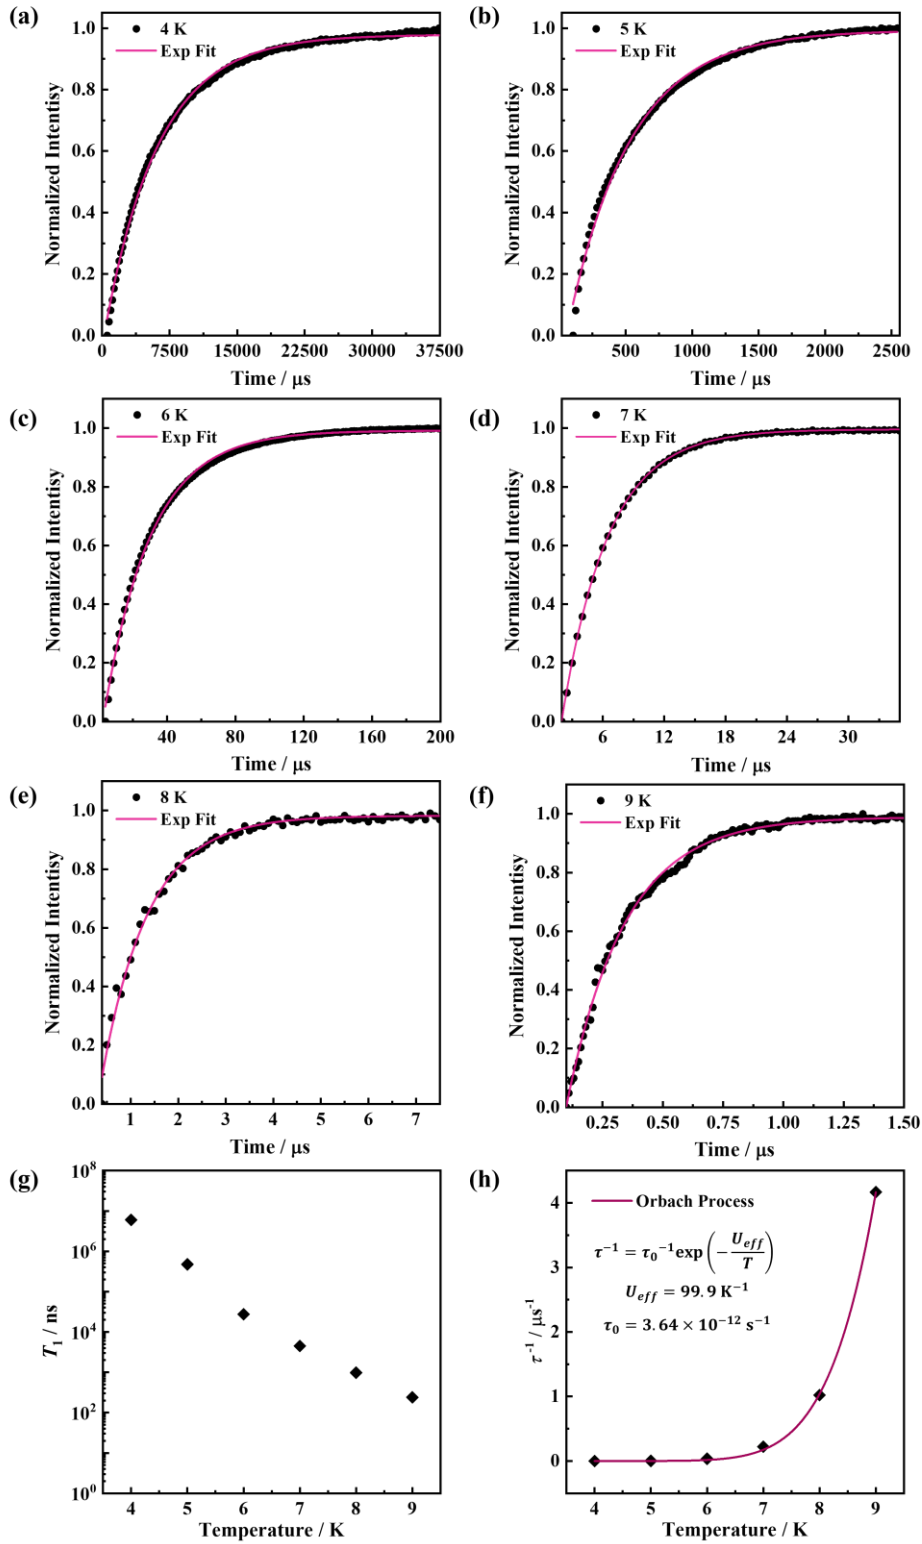

Fig.S5. (a)-(f)  $T_1$  data (black point) measured at different temperatures at 3907 G and individual exponential fitting curves (wine line). (g) Temperature dependence of  $T_1$  at 3907 G. (h) Fitting the spin relaxation mechanism.

Table S2.  $T_1$  and  $T_m$  data at 5 K when  $B_0 \parallel \mathbf{b}$ .

| $B_0 / \text{G}$ | $T_1 / \mu\text{s}$ | $T_m / \text{ns}$ |
|------------------|---------------------|-------------------|
| 3561             | 479.96              | 576.67            |
| 3606             | 498.94              | 563.50            |
| 3651             | 489.18              | 588.81            |
| 3700             | 444.07              | 600.69            |
| 3750             | 450.15              | 567.71            |
| 3802             | 490.17              | 606.86            |
| 3853             | 502.49              | 586.31            |
| 3907             | 475.27              | 664.97            |

Table S3.  $T_1$  data between 4-9 K at 3907 G.

| $T / \text{K}$ | $T_1 / \mu\text{s}$ |
|----------------|---------------------|
| 4              | 5995.39             |
| 5              | 475.27              |
| 6              | 27.45               |
| 7              | 4.51                |
| 8              | 0.98                |
| 9              | 0.24                |

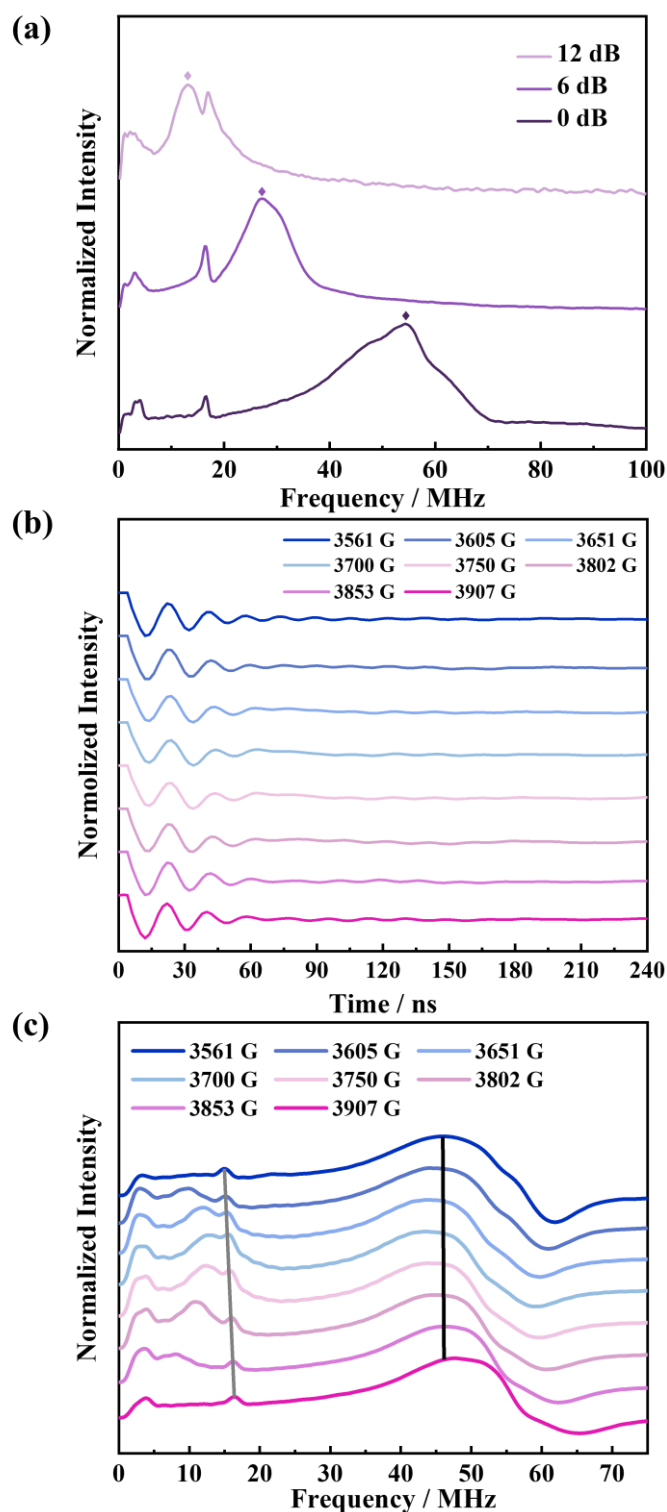

Fig.S6. (a) FFT of Rabi oscillations measured at 3907 G by a range of attenuation settings. (b) Rabi oscillations of the single crystal sample measured at different fields when  $B_0 \parallel \mathbf{b}, B_1 \parallel \mathbf{a}$  at 5 K, 0 dB. (c) FFT of (b). Black and grey solid lines correspond to Rabi frequencies and  $^1\text{H}$  Larmor frequencies respectively.



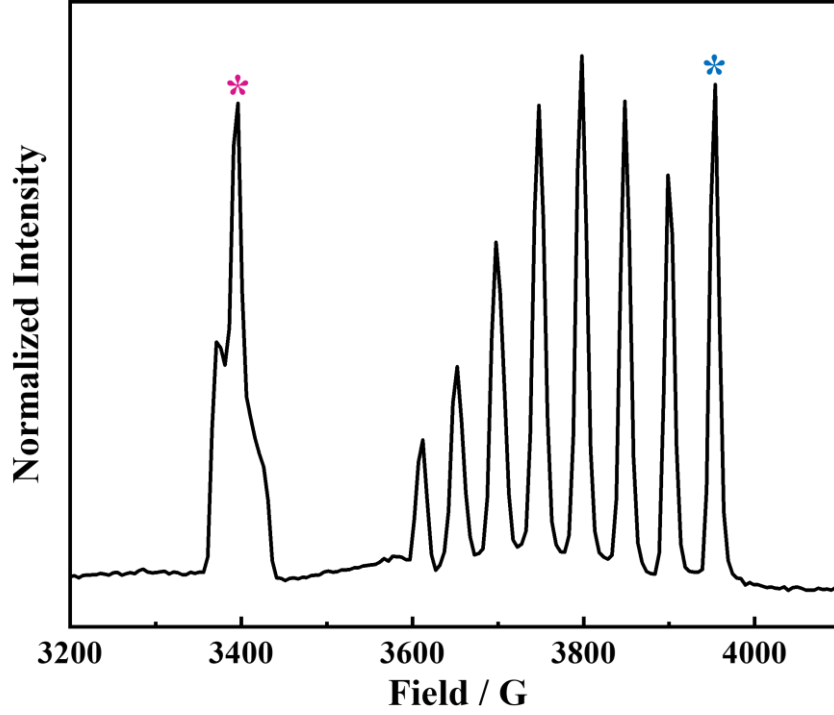

Fig.S7. EDFs of  $\text{Zn}_{0.994}\text{Co}_{0.006}$  with internal standard TEMPO at 5 K, 0 dB when  $B_0 \parallel \mathbf{b}$ . The absolute values of experimental  $B_1$  and  $g_{\text{eff}}$  are calibrated by the peak with wine mark. The Rabi oscillations of  $\text{Zn}_{0.994}\text{Co}_{0.006}$  without specific description of  $B_0$  field in Fig.S8-9 are measured on the transition with blue mark.

$$B_1 = \frac{\Omega_{\text{TEMPO}}}{\mu_B g_{\text{TEMPO}}} \quad (\text{Eq. S1 - 1})$$

$$g_{\text{eff}} = \frac{g_{\text{TEMPO}}}{\Omega_{\text{TEMPO}}} * \Omega_{\text{Sample}} \quad (\text{Eq. S1 - 2})$$

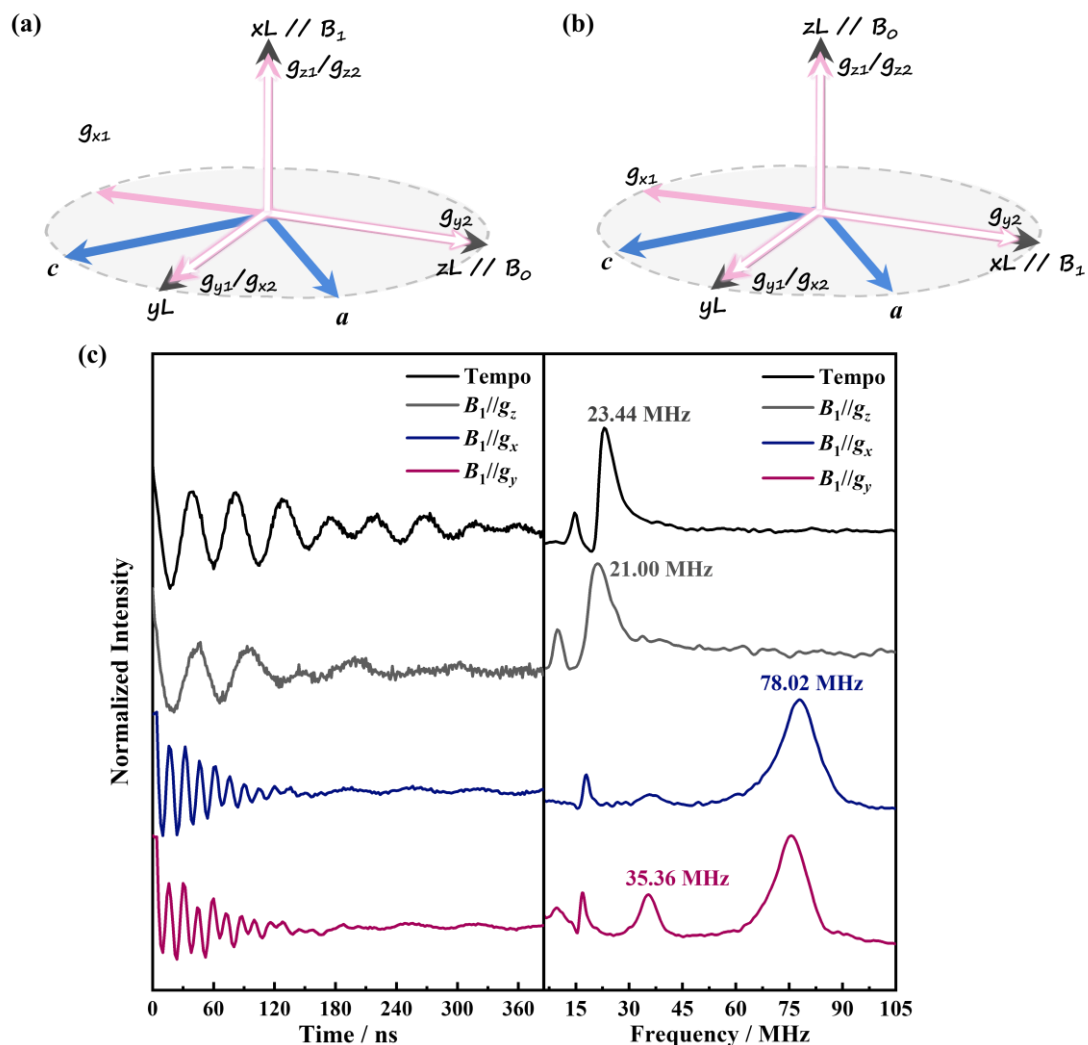

Fig.S8. Sketch of relative position between the lab frame and tensor frames in anisotropic Rabi oscillation experiments, depicting the case  $B_1 \parallel g_z$  (a) and  $B_1 \parallel g_{x,y}$  (b) respectively. The pink frame and white frame represent the tensor frames for Co-1 and Co-2 respectively.  $xL$ ,  $yL$ ,  $zL$  represent the lab frame (dark grey).  $zL$  is along the static magnetic field  $B_0$ ,  $xL$  is along microwave magnetic field  $B_1$ . The blue frame represents crystal frame but  $b$ -axis is omitted. (c) Left: Rabi oscillations of internal standard TEMPO and  $Zn_{0.994}Co_{0.006}$  crystal when  $B_1 \parallel g_z$ ,  $g_x$ ,  $g_y$  respectively. Right: FFT of Rabi oscillations shown on the left.

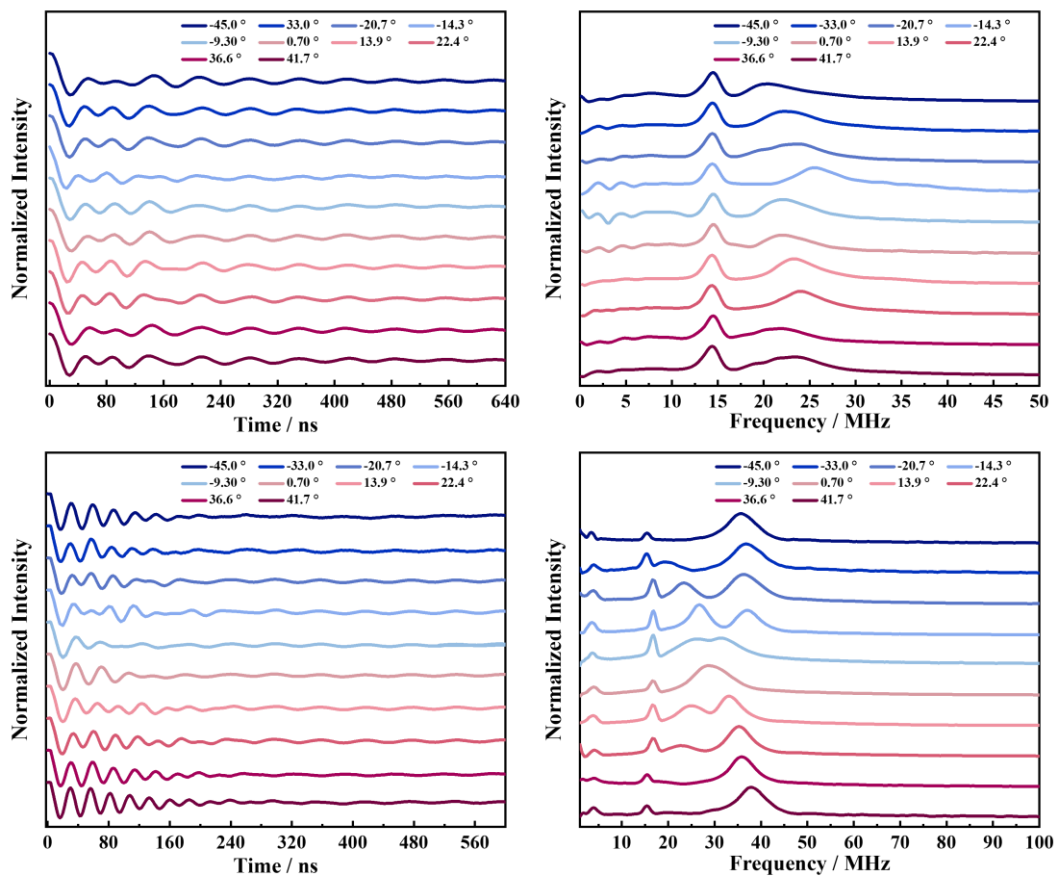

Fig.S9. Anisotropic Rabi oscillation experiments with internal standard. (a) Rabi oscillations of TEMPO measured with variable rotation angle  $\alpha$  at 5 K, 0 dB. (b) FFT of (a). (c) Rabi oscillations of **Zn<sub>0.994</sub>Co<sub>0.006</sub>** measured with variable rotation angle  $\alpha$  at 5 K, 6 dB. (d) FFT of (c).

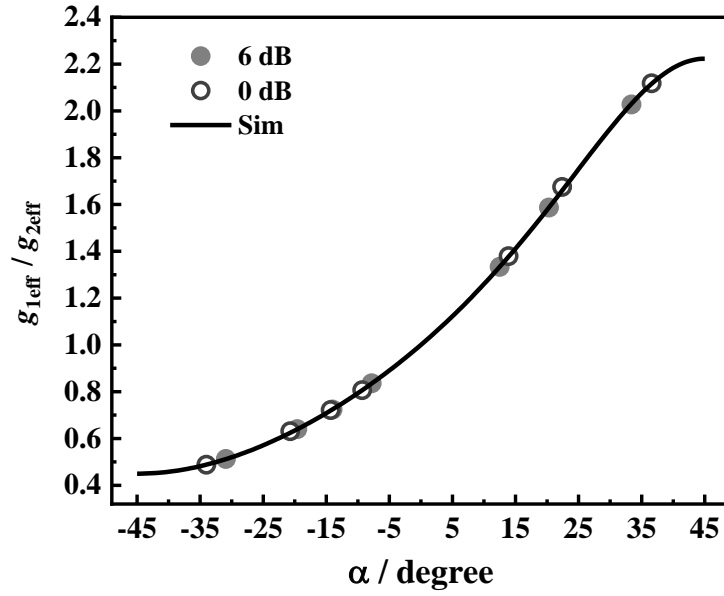

Fig.S10. Calibration of experimental rotation angle  $\alpha$ . The black line is the calculated variation of  $g_{1eff}/g_{2eff}$  with  $\alpha$ . Matching the ratio of two Rabi frequencies in Fig.4c (0 dB, open circle) and Fig.S9d (6 dB, grey circle) to calibrate experimental  $\alpha$ .

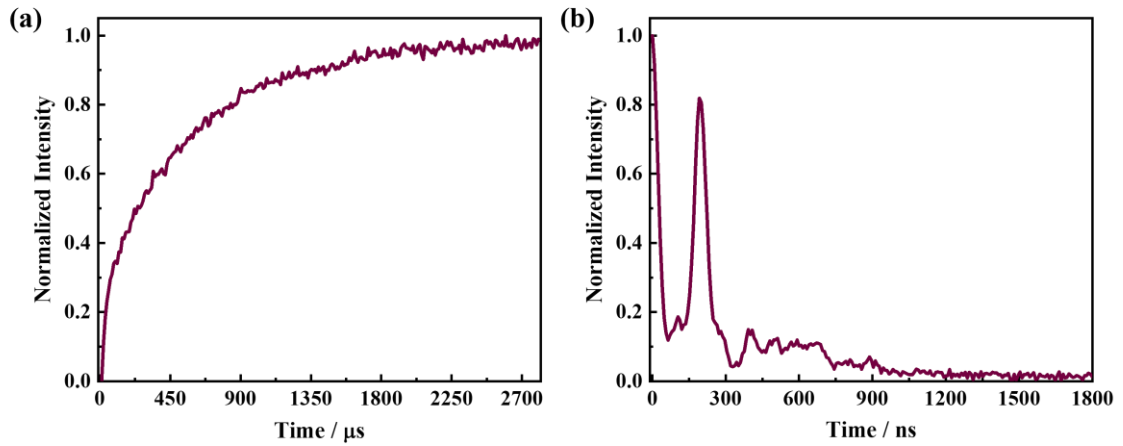

Fig.S11.  $T_1$  (a) and  $T_m$  (b) curves at 5 K when  $B_0$  is along  $g_y$  direction ( $\pi/2 = 16$  ns,  $\tau = 260$  ns). Modelling the curves with single exponential function as  $T_1 = 457.67$   $\mu$ s and  $T_M = 283$  ns.

## SI 2 Theoretical analysis of anisotropic Rabi oscillation (I)

Considering a  $S = \frac{1}{2}$  system with

$$\hat{H}_0 = \mu_B \vec{B} \vec{g} \hat{S}.$$

Based on the model shown in Fig.4a, i.e.  $B_0 \parallel g_z$ ,  $g$  tensor should be expressed in lab frame as

$$\vec{g} = \bar{R}(\beta, 0, 0) \begin{pmatrix} g_x & 0 & 0 \\ 0 & g_y & 0 \\ 0 & 0 & g_z \end{pmatrix} \bar{R}^\dagger(\beta, 0, 0) = \begin{pmatrix} g_{xx} & g_{xy} & 0 \\ g_{yx} & g_{yy} & 0 \\ 0 & 0 & g_{zz} \end{pmatrix},$$

where  $\bar{R}(\beta, 0, 0)$  and  $\bar{R}^\dagger(\beta, 0, 0)$  represent the Euler rotation matrixes and

$$g_{zz} = g_z$$

$$g_{xx}(\beta) = g_x \cos \beta^2 + g_y \sin \beta^2 \quad (\text{Eq. S2 - 1})$$

$$g_{xy}(\beta) = (g_y - g_x) \cos \beta \sin \beta \quad (\text{Eq. S2 - 2})$$

The total Hamilton of the system is

$$\hat{H} = \hat{H}_0 + \hat{H}_1(t, \beta),$$

where

$$\hat{H}_0 = \mu_B B_0 g_z \hat{S}_z \quad (\omega_0 = \mu_B B_0 g_z),$$

$$\hat{H}_1(t, \beta) = \mu_B B_1 (\cos(\omega_{mw} t + \phi) \quad 0) \begin{pmatrix} g_{xx}(\beta) & g_{xy}(\beta) \\ g_{yx}(\beta) & g_{yy}(\beta) \end{pmatrix} \begin{pmatrix} \hat{S}_x \\ \hat{S}_y \end{pmatrix}.$$

We describe the system in a rotating frame with the microwave frequency  $\omega_{mw}$ , the total Hamilton becomes

$$\hat{H}_{rot} = \hat{R}_z (\hat{H} - \omega_{mw} \hat{S}_z) \hat{R}_z^\dagger = \exp(i\omega_{mw} t \hat{S}_z) (\hat{H} - \omega_{mw} \hat{S}_z) \exp(-i\omega_{mw} t \hat{S}_z).$$

So

$$\hat{H}_{rot} = \frac{1}{2} \begin{pmatrix} \omega_0 - \omega_{mw} & \mu_B B_1 \cos(\omega t + \phi) (g_{xx}(\beta) - g_{xy}(\beta)i) e^{i\omega t} \\ \mu_B B_1 \cos(\omega t + \phi) (g_{xx}(\beta) + g_{xy}(\beta)i) e^{-i\omega t} & -(\omega_0 - \omega_{mw}) \end{pmatrix}.$$

Base on Euler's formula,

$$\hat{H}_{rot} = \frac{1}{2} \begin{pmatrix} \omega_0 - \omega_{mw} & \mu_B B_1 (g_{xx}(\beta) - g_{xy}(\beta)i) [e^{-i\phi} + e^{i(2\omega t + \phi)}] \\ \mu_B B_1 (g_{xx}(\beta) + g_{xy}(\beta)i) [e^{i\phi} + e^{-i(2\omega t + \phi)}] & -(\omega_0 - \omega_{mw}) \end{pmatrix}.$$

The terms  $e^{\pm i(2\omega t + \phi)}$  can be neglected using the rotating wave approximation. Finally, in the resonance condition,  $\omega_0 = \omega_{mw}$ , and the total Hamilton can be expressed as

$$\hat{H}_{rot} = \frac{\mu_B B_1}{2} \begin{pmatrix} 0 & (g_{xx}(\beta) - g_{xy}(\beta)i)e^{-i\phi} \\ (g_{xx}(\beta) + g_{xy}(\beta)i)e^{i\phi} & 0 \end{pmatrix}.$$

For a general notation,

$$\hat{H}_{rot} = \mu_B B_1 [A(\beta, \phi) \hat{S}_x + B(\beta, \phi) \hat{S}_y], \quad (\text{Eq. S3 - 1})$$

where

$$A(\beta, \phi) = g_{xx}(\beta) \cos \phi - g_{xy}(\beta) \sin \phi, \quad (\text{Eq. S3 - 2})$$

$$B(\beta, \phi) = g_{xx}(\beta) \sin \phi + g_{xy}(\beta) \cos \phi. \quad (\text{Eq. S3 - 3})$$

Therefore, the rotation of spin in Bloch sphere will be determined by:

$$g_{eff}(\beta) = \sqrt{A^2 + B^2} = \sqrt{g_{xx}(\beta)^2 + g_{xy}(\beta)^2}, \quad (\text{Eq. S4 - 1})$$

$$\Phi(\beta, \phi) = \tan^{-1} \left( \frac{B}{A} \right). \quad (\text{Eq. S4 - 2})$$

$g_{eff}(\alpha)$  decides the nutation rate:

$$\Omega_{rabi}(\beta) = \mu_B B_1 \sqrt{g_{xx}(\beta)^2 + g_{xy}(\beta)^2}.$$

### SI 3 Theoretical analysis of anisotropic Rabi oscillation (II)

Considering a  $S = \frac{1}{2}$  system with

$$\hat{H}_0 = \mu_B \vec{B} \vec{g} \hat{S}.$$

Considering a model analogue to Fig.S8, i.e.  $B_1$  coincides with a certain principal axis of the  $\vec{g}$  but  $B_0$  does not.  $\vec{g}$  should be expressed in lab frame as

$$\vec{g} = \begin{pmatrix} g_{xx} & 0 & 0 \\ 0 & g_{yy} & g_{yz} \\ 0 & g_{zy} & g_{zz} \end{pmatrix}.$$

The static magnetic field Hamiltonian is

$$\hat{H}_0 = \mu_B \begin{pmatrix} 0 & 0 & B_0 \end{pmatrix} \begin{pmatrix} g_{xx} & 0 & 0 \\ 0 & g_{yy} & g_{yz} \\ 0 & g_{zy} & g_{zz} \end{pmatrix} \begin{pmatrix} \hat{S}_x \\ \hat{S}_y \\ \hat{S}_z \end{pmatrix} = \mu_B B_0 (g_{zy} \hat{S}_y + g_{zz} \hat{S}_z).$$

Diagonalize  $\hat{H}_0$  and acquire the unitary transformation  $U$  and Larmor frequency as following

$$\hat{H}_0' = U \hat{H}_0 U^\dagger,$$

$$\omega_0 = \mu_B B_0 \sqrt{g_{zy}^2 + g_{zz}^2}.$$

Time dependent microwave Hamiltonian can be expressed as

$$\hat{H}_1(t) = \mu_B g_{xx} B_1 \cos(\omega t + \phi) \hat{S}_x.$$

Unitary transformation  $U$  will be used to rotate  $\hat{H}_1(t)$  to eigen basis,

$$\hat{H}_1'(t) = U \hat{H}_1 U^\dagger.$$

The total Hamiltonian of the system is

$$\hat{H} = \hat{H}_0' + \hat{H}_1'(t).$$

We describe the system in a rotating frame with the microwave frequency  $\omega_{mw}$ , the total Hamiltonian becomes

$$\hat{H}_{rot} = \hat{R}_z (\hat{H} - \omega_{mw} \hat{S}_z) \hat{R}_z^\dagger,$$

where

$$\hat{R}_z = \exp(i\omega_{mw} t \hat{S}_z).$$

So

$$\hat{H}_{rot} = \frac{1}{2} \begin{pmatrix} \omega_0 - \omega_{mw} & \mu_B B_1 g_{xx} \cos(\omega t + \phi) e^{i\omega t} \\ \mu_B B_1 g_{xx} \cos(\omega t + \phi) e^{-i\omega t} & -(\omega_0 - \omega_{mw}) \end{pmatrix}.$$

Base on Euler's formula,

$$\hat{H}_{rot} = \frac{1}{2} \begin{pmatrix} \omega_0 - \omega_{mw} & \mu_B B_1 g_{xx} [e^{-i\phi} + e^{i(2\omega t + \phi)}] \\ \mu_B B_1 g_{xx} [e^{i\phi} + e^{-i(2\omega t + \phi)}] & -(\omega_0 - \omega_{mw}) \end{pmatrix}.$$

The terms  $e^{\pm i(2\omega t + \phi)}$  can be neglected using the rotating wave approximation. Finally, in the resonance condition,  $\omega_0 = \omega_{mw}$ , and the total Hamilton can be expressed as

$$\hat{H}_{rot} = \frac{1}{2} \begin{pmatrix} 0 & \mu_B B_1 g_{xx} e^{-i\phi} \\ \mu_B B_1 g_{xx} e^{i\phi} & 0 \end{pmatrix}.$$

Diagonalize  $\hat{H}_{rot}$  and Rabi frequency is therefore determined as

$$\Omega_{rabi} = \mu_B B_1 g_{xx}.$$

In our case shown in Fig.S8a,  $g_{xx} = g_z$ , so Rabi frequency is expressed as

$$\Omega_{Rabi} = g_z \mu_B B_1.$$
